# Supplementary material for: D3, the new diffractometer for the macromolecular crystallography beamlines of the Swiss Light Source
Source: PubMed Central journal article supplement (PMC3945418; doi:10.1107/s160057751400006x), 2014-02-04
Supplement: s-21-00340-sup2.pdf [file s-21-00340-sup2.pdf]

## Supplementary material

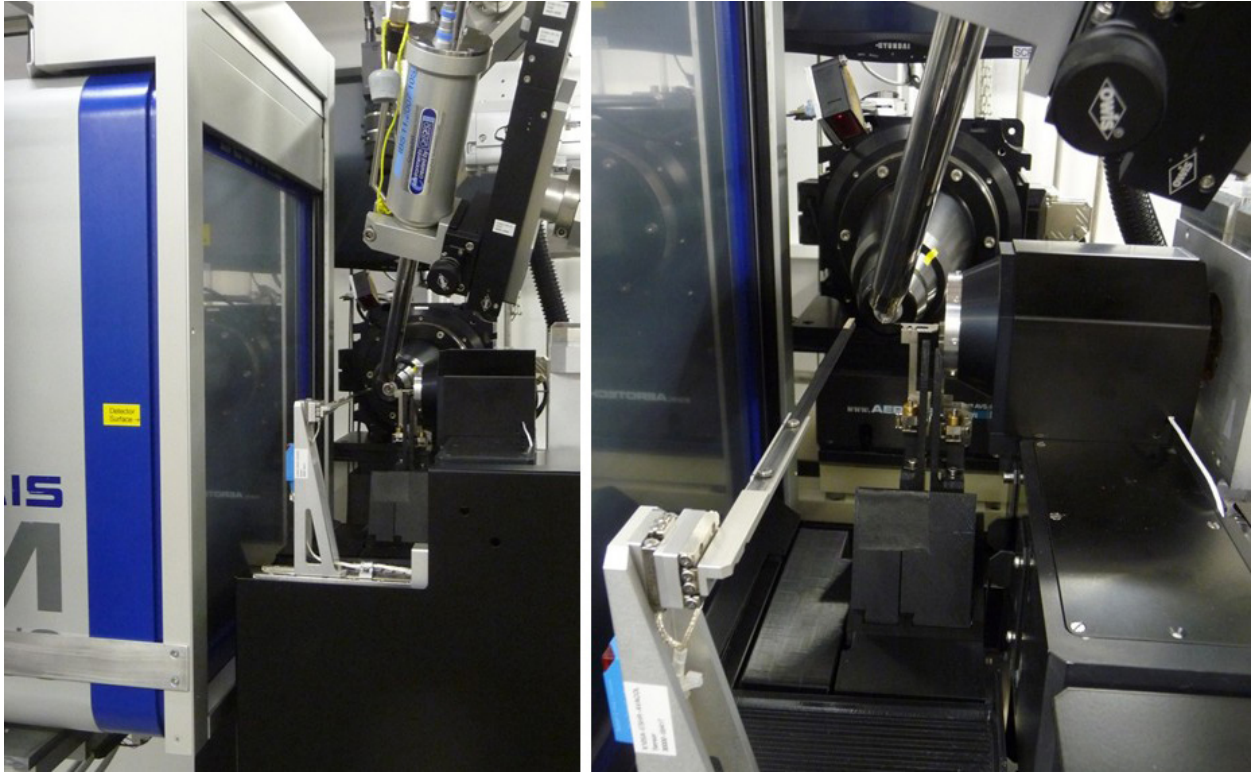

**Figure 2** Left: Sample environment with the Pilatus 6M detector with opened protective cover. Right: Sample environment in Data Acquisition state, with retracted illumination and extended beam shaping devices.
