# Supplementary material for: D3, the new diffractometer for the macromolecular crystallography beamlines of the Swiss Light Source
Source: PubMed Central journal article supplement (PMC3945418; doi:10.1107/s160057751400006x), 2014-02-04
Supplement: s-21-00340-sup3.pdf [file s-21-00340-sup3.pdf]

## Supplementary material

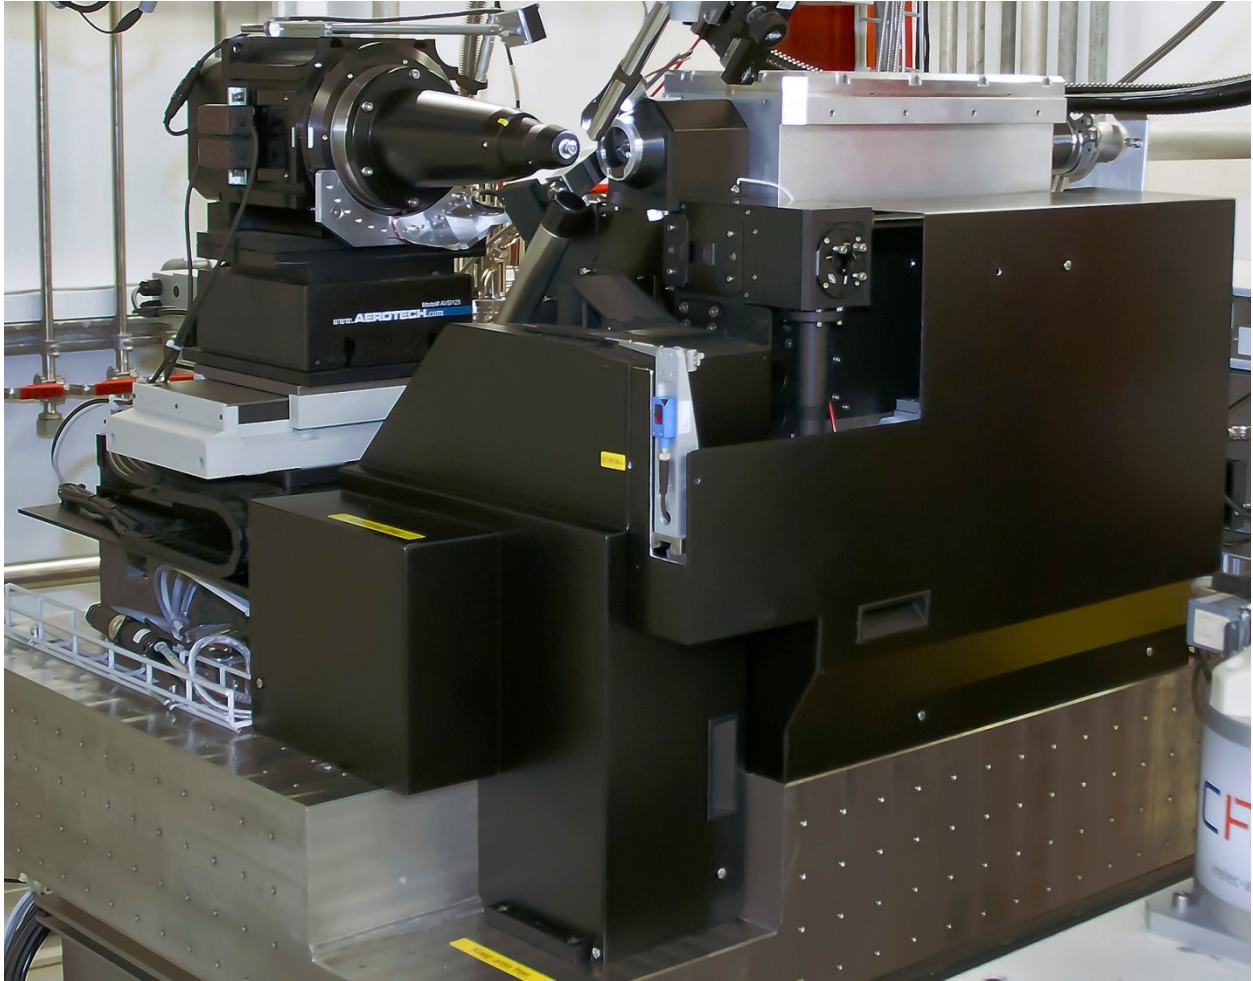

**Figure 3** Diffractometer cover close to sample. A two-piece Al-cover protects all cabling and actuators of the diffractometer with the exception of the goniometer at left.
